# Supplementary material for: Praxisorientierter Umgang mit späten Schwangerschaftsabbrüchen und Fetoziden
Source: Springer Nature journal article supplement (doi:10.1007/s00129-023-05110-z), 2023-06-29
Supplement: MOESM1 [file 25552318]

## Zusätzliche Tabelle 1:

Bestattungsrichtlinien des jeweiligen Bundeslandes für Fehl- und Totgeburten und Leibesfrüchte aus späten Schwangerschaftsabbrüchen. Zusammengestellt aus dem Bestattungsgesetz des jeweiligen Bundeslandes. SSW = Schwangerschaftswoche, p.c. = post conceptionem

| Bundesland                    | Individuelle Bestattungspflicht                                                                  | Fehlgeburt < 500 g in einer gesundheitlichen Einrichtung<br><br>Auf Wunsch eine Elternteils individuelle Bestattung möglich                                                                                                           | Kinder/Leibesfrüchte aus Schwangerschaftsabbrüchen<br><br>Auf Wunsch eine Elternteils individuelle Bestattung möglich                                                              |
|-------------------------------|--------------------------------------------------------------------------------------------------|---------------------------------------------------------------------------------------------------------------------------------------------------------------------------------------------------------------------------------------|------------------------------------------------------------------------------------------------------------------------------------------------------------------------------------|
| <b>Baden-Württemberg</b>      | Totgeburt > 500 g                                                                                | durch Einrichtung auf deren Kosten bestattungspflichtig (z. B. Sammelbestattung)                                                                                                                                                      | durch Einrichtung auf deren Kosten bestattungspflichtig (z. B. Sammelbestattung)                                                                                                   |
| <b>Bayern</b>                 | Totgeburt > 500 g                                                                                | soll durch den Verfügungsberechtigten auf einem Grabfeld (oder eingeäschert und dann) beerdigt werden; Sammelbestattung möglich                                                                                                       | soll durch den Verfügungsberechtigten auf einem Grabfeld oder eingeäschert und dann beerdigt werden; Sammelbestattung möglich                                                      |
| <b>Berlin</b>                 | Totgeburt > 1000 g                                                                               | durch Einrichtung hygienisch einwandfrei und dem sittlichen Empfinden entsprechend zu beseitigen                                                                                                                                      | durch Einrichtung hygienisch einwandfrei und dem sittlichen Empfinden entsprechend zu beseitigen                                                                                   |
| <b>Brandenburg</b>            | Totgeburt > 500 g                                                                                | durch Einrichtung auf Kosten der Einrichtung bestattungspflichtig (z. B. Sammelbestattung)                                                                                                                                            | durch Einrichtung auf Kosten der Einrichtung bestattungspflichtig (z. B. Sammelbestattung)                                                                                         |
| <b>Bremen</b>                 | Totgeburt > 1000 g<br><br>< 1000 g nur auf Wunsch eines Elternteils mit ärztlicher Bescheinigung | durch Einrichtungen zu sammeln und beizusetzen<br><br>auf Wunsch eines Elternteils werden Fehlgeborene bestattet, wenn ärztliche Bestätigung vorliegt, dass > 12 Wochen p.c.; Beilegung zur Leiche einer anderen Person kann erfolgen | > 12 SSW: durch Einrichtungen zu sammeln und beizusetzen<br><br>< 12 SSW: können ebenso gesammelt und beigesetzt werden                                                            |
| <b>Hamburg</b>                | Totgeburt > 1000 g                                                                               | Totgeborene < 1000 g oder Fehlgeburten: Einäscherung und Beerdigung durch Einrichtung, sofern nicht rechtmäßig für wissenschaftliche Zwecke benötigt                                                                                  | Einäscherung und Beerdigung durch Einrichtung, sofern nicht rechtmäßig für wissenschaftliche Zwecke benötigt. Eltern ist auf Wunsch die Teilnahme an der Beisetzung zu ermöglichen |
| <b>Hessen</b>                 | Totgeburt > 500 g oder nach der 24. SSW                                                          |                                                                                                                                                                                                                                       |                                                                                                                                                                                    |
| <b>Mecklenburg-Vorpommern</b> | Totgeburt > 1000 g                                                                               | Totgeborene < 1000 g oder Fehlgeburten: Einäscherung und Beerdigung durch Einrichtung                                                                                                                                                 | hygienisch einwandfrei und dem sittlichen Empfinden entsprechend einer Verbrennung zuzuführen                                                                                      |
| <b>Niedersachsen</b>          | Totgeburt > 500 g<br><br>Auch aus späten SS-Abbrüchen                                            | Fehlgeburt < 500 g: Verbrennung, veranlasst durch Einrichtung                                                                                                                                                                         | > 500 g: individuelle Bestattung<br><br>< 500 g: Verbrennung, veranlasst durch Einrichtung                                                                                         |
| <b>Nordrhein-Westfalen</b>    | Totgeburt                                                                                        | Tot- und Fehlgeburten von den Einrichtungen unter würdigen Bedingungen zu sammeln und zu bestatten                                                                                                                                    | von den Einrichtungen unter würdigen Bedingungen zu sammeln und zu bestatten                                                                                                       |

Praxisorientierter Umgang mit späten Schwangerschaftsabbrüchen und Fetozyden

|                           |                                            |                                                                                                                                                                                                 |                                                                                                                                                                                                 |
|---------------------------|--------------------------------------------|-------------------------------------------------------------------------------------------------------------------------------------------------------------------------------------------------|-------------------------------------------------------------------------------------------------------------------------------------------------------------------------------------------------|
| <b>Rheinland-Pfalz</b>    | Totgeburt<br>> 500 g                       | Sammelbestattung durch Einrichtung                                                                                                                                                              | Sammelbestattung durch Einrichtung unter würdigen Bedingungen, individuelle Bestattung nur mit Einwilligung der Frau                                                                            |
| <b>Saarland</b>           | Totgeburt<br>> 500 g oder 24. SSW erreicht | Fehlgeburt vor 24. SSW und < 500 g: durch Einrichtung hygienisch einwandfrei und dem sittlichen Empfinden entsprechend einzuäschern, aufzubewahren und einer Beisetzung zuzuführen              | durch Einrichtung hygienisch einwandfrei und dem sittlichen Empfinden entsprechend einzuäschern, aufzubewahren und einer Beisetzung zuzuführen                                                  |
| <b>Sachsen</b>            | Totgeburt<br>> 500 g                       | gelten nicht als menschliche Leiche                                                                                                                                                             | sind nicht individuell bestattungspflichtig, sind aber innerhalb eines Jahres zu bestatten                                                                                                      |
| <b>Sachsen-Anhalt</b>     | Totgeburt<br>> 500 g                       | in gesundheitlich unbedenklicher Weise und unter herrschenden sittlichen Vorstellungen zu beseitigen, sofern sie für wissenschaftliche oder andere Zwecke nicht oder nicht mehr benötigt werden | in gesundheitlich unbedenklicher Weise und unter herrschenden sittlichen Vorstellungen zu beseitigen, sofern sie für wissenschaftliche oder andere Zwecke nicht oder nicht mehr benötigt werden |
| <b>Schleswig-Holstein</b> | Totgeburt<br>> 500 g                       | keine Bestattungspflicht                                                                                                                                                                        | keine Bestattungspflicht                                                                                                                                                                        |
| <b>Thüringen</b>          | Totgeburt > 500 g                          | > 12. SSW anonym gesammelt bestatten                                                                                                                                                            | > 12. SSW anonym gesammelt bestatten                                                                                                                                                            |
